# Supplementary material for: A novel magnetic fluid for ultra-fast and highly efficient extraction of N1-methylnicotinamide in urine samples
Source: Royal Society of Chemistry journal article supplement (doi:10.1039/d3nj00488k), 2023-01-01
Supplement: d3nj00488k1.pdf [file d3nj00488k1.pdf]

***New Journal of Chemistry***

**Supplementary Information**

**A novel magnetic fluid for ultra-fast and highly efficient  
extraction of N<sup>1</sup>-Methylnicotinamide in urine samples**

Zhuhui Chen<sup>1†</sup>, Yue Xiong<sup>1†</sup>, Ranran Ma<sup>1</sup>, Pei Chen<sup>1</sup>, Le Duan<sup>1</sup>, Shuying Yang<sup>1</sup>, Ineza Urujeni Gisèle<sup>1</sup>,  
Linjun You<sup>2\*</sup>, Deli Xiao<sup>1,3,4\*</sup>

1 Department of Analytical Chemistry, China Pharmaceutical University, Nanjing 210009, China

2 Center for New Drug Safety Evaluation and Research, China Pharmaceutical University, 24  
Tongjia Lane, Nanjing 210009, China.

3 Key Laboratory of Drug Quality Control and Pharmacovigilance (China Pharmaceutical University),  
Ministry of Education, 24 Tongjia Lane, Nanjing 210009, China

4 Key Laboratory of Biomedical Functional Materials, China Pharmaceutical University, Nanjing  
210009, China

† Zhuhui Chen and Yue Xiong equally contributed to this work and should be considered co-first  
authors

\* Correspondence to: 24 Tongjia Lane, Nanjing 210009, China

E-mail: xiao49562001@163.com, youlinjun@cpu.edu.cn

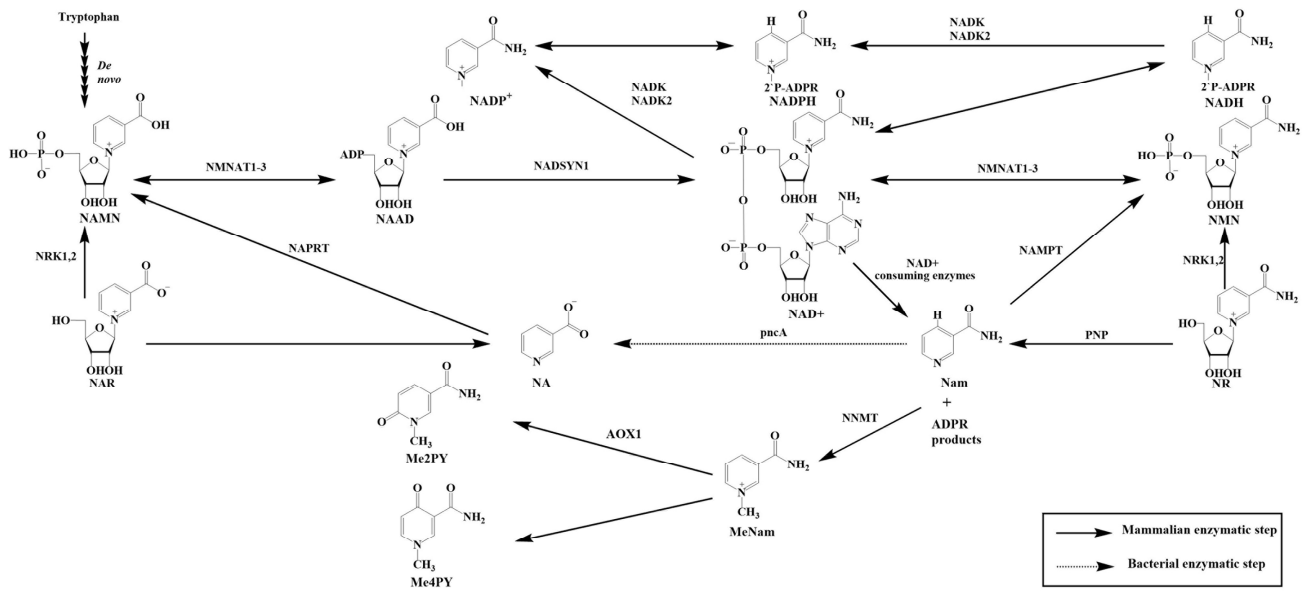

**Fig. S1 NAD<sup>+</sup> metabolome.** NAD<sup>+</sup> is synthesized by salvaging vitamin precursors or obtained from tryptophan in a novel pathway. NAD<sup>+</sup> can be consumed to generate Nam. Nam can also be methylated and oxidized to metabolites.

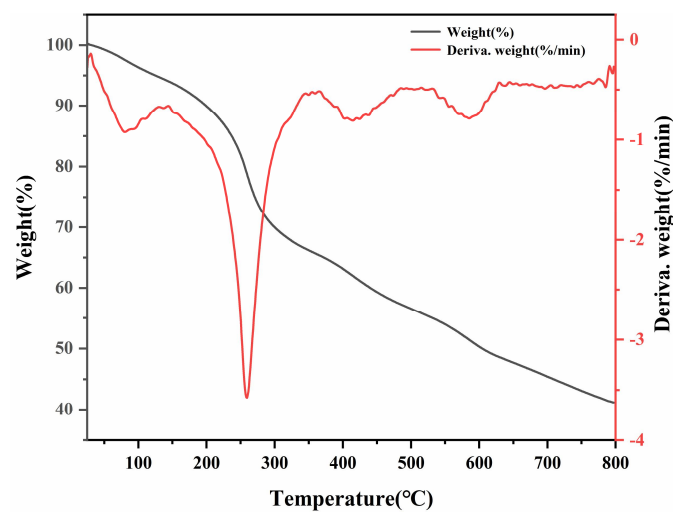

**Fig. S2** TGA curve of the Fe<sub>3</sub>O<sub>4</sub>@HPMC@DMSA NPs.

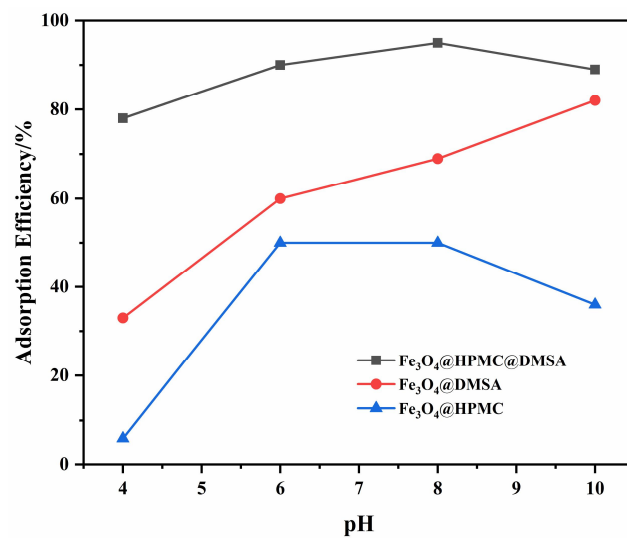

Fig. S3 Graph of the effect of pH on the adsorption efficiency of the three materials.

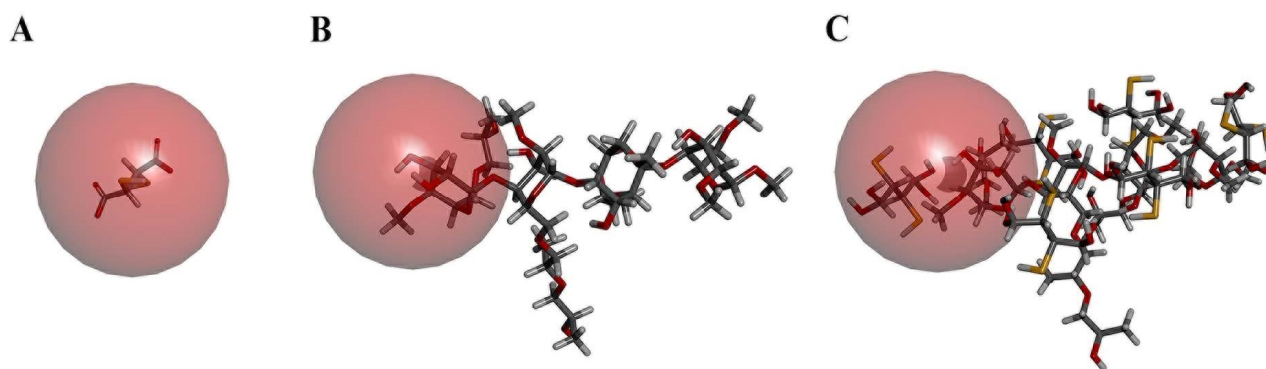

Fig. S4 The active docking site of HPMC, DMSA and HPMC @ DMSA.

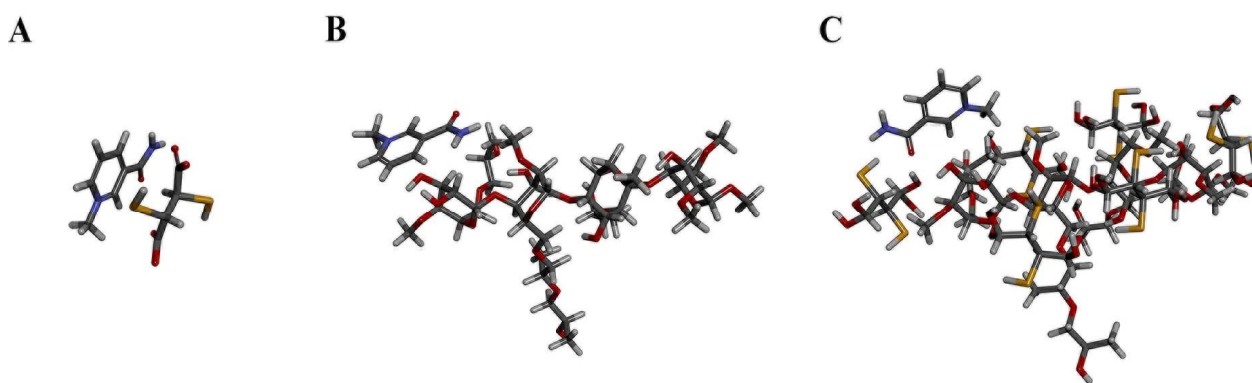

Fig. S5 The docking conformation of MeNam with HPMC, DMSA and HPMC @ DMSA.

Table S1. Docking energy of MeNam with HPMC, DMSA and HPMC@DMSA.

| Docking Conformation | -CDOCKER-<br>ENERGY<br>(kcal/mol) | -CDOCKER-<br>INTERACTION-<br>ENERGY<br>(kcal/mol) | Electrostatic<br>Energy<br>(kcal/mol) | Hydrogen<br>Bond<br>Energy<br>(kcal/mol) | Van der<br>Waals<br>Energy<br>(kcal/mol) | RMS<br>Gradient |
|----------------------|-----------------------------------|---------------------------------------------------|---------------------------------------|------------------------------------------|------------------------------------------|-----------------|
| MeNam-HPMC           | 4.0136                            | 7.1170                                            | -1.7666                               | -4.3756                                  | 1.7537                                   | 0.0097          |
| MeNam-DMSA           | 12.0203                           | 17.0409                                           | -9.9746                               | -0.1534                                  | 1.9453                                   | 0.0066          |
| MeNam-HPMC@DMSA      | 7.8374                            | 11.0266                                           | -7.6778                               | -3.5324                                  | 1.5395                                   | 0.0089          |

**Table S2.** Comparison of analytical performance of the proposed method with other methods.

| Preconcentration         | Detection technique | Column                                                          | Analytes                                                                                                                                                           | Linearity                                                        | LOD          | Intra-assay CVs | Inter-assay CVs | Recovery  | Sample                         | Reference |
|--------------------------|---------------------|-----------------------------------------------------------------|--------------------------------------------------------------------------------------------------------------------------------------------------------------------|------------------------------------------------------------------|--------------|-----------------|-----------------|-----------|--------------------------------|-----------|
|                          | LC/MS               | C18-BDS Column (150 × 2.0 mm, 3 μm)                             | NA, N-methylnicotinamide (NMA), 2PY, 4PY, M2PY, NOX, M4PY, and 4PYR                                                                                                | /                                                                | /            | <10%            | >20%            | /         | human and rat plasma and urine | 1         |
| Without extraction       | HPLC-ESI-MS/MS      | Synergi 4u polar-RP column (250 × 4.6 mm)                       | N <sup>1</sup> -Methylnicotinamide (NMNAM), nicotinic acid (NA), nicotinamide (NAM), N <sup>1</sup> -methyl-2-pyridone-5-carboxamide(2-Py), nicotinuric acid (NUA) | 10-1000 ng mL <sup>-1</sup> (N <sup>1</sup> -methylnicotinamide) | /            | ≤3.1%           | ≤5.6%           | 113 ± 13% | Urine                          | 2         |
|                          | LC-MS/MS            | a Waters Spherisorb S5 CN microbore column (2.0 × 100 mm, 5 μm) | Nicotinamide, N <sup>1</sup> -methylnicotinamide                                                                                                                   | 2.500–80.00 ng/mL (N <sup>1</sup> -methylnicotinamide)           | /            | 6.90%           | 6.90%           | >88%      | human serum                    | 3         |
| liquid/liquid extraction | HPLC-UV             | Biphenyl Column (100 × 2.1 mm, 2.6 μm)                          | N-methyl-2-pyridone-5-carboxamide (2PYr) and N-1-methylnicotinamide (NMN)                                                                                          | 0.8630–25.89 μg/mL (N-1-methylnicotinamide)                      | /            | <8%             | <8%             | 91 ± 5.4% | Urine                          | 4         |
| MSPE                     | HPLC-UV             | BaseLine C18 Column (4.6 × 150 mm, 5 μm)                        | N <sup>1</sup> -methylnicotinamide (MeNam)                                                                                                                         | 0.1–80 μg/mL                                                     | 0.0375 μg/mL | <10%            | <10%            | >95%      | Urine                          | This work |

1. E. M. Slominska, P. Adamski, M. Lipinski, J. Swierczynski and R. T. Smolenski, *Nucleosides*

*Nucleotides Nucleic Acids*, 2006, **25**, 1245-1249.

2. J. I. Kreime, K. Gömpel, T. Bakuradze, G. Eisenbrand and E. Richling, *Molecular Nutrition & Food Research*, 2018, **62**, Article 1700735.
3. J. Chu, M. Liu, G. Dai, C. Li, T. Wu, J. Zou, W. Ju and M. Xu, *Biomed Chromatogr*, 2022, **36**, 5261.
4. V. L. Nguyen, R. Saldanha and M. Fitzpatrick, *J Chromatogr Sci*, 2021, **59**, 770-775.
